# Supplementary material for: Observation of Two-Step Spin Transition in Graphene Oxide-Based Hybrids with Iron(II) 4-amino-1,2,4-triazole Spin Crossover Nanoparticles
Source: MDPI journal article supplement (doi:10.3390/molecules28155816), 2023-08-02
Supplement: s1 [file s1]

**Observation of two-step spin transition in Graphene Oxide based hybrids with iron(II) 4-amino-1,2,4-triazole spin crossover nanoparticles**

**Nikolia Lalioti<sup>1\*</sup>, Alexander Charitos<sup>1</sup>, John Parthenios<sup>2</sup>, Ondrej Malina<sup>3\*</sup>, Michaela Polaskova<sup>3</sup>, Martin Petr<sup>3</sup>, Vassilis Tangoulis<sup>1</sup>**

<sup>1</sup> Department of Chemistry, Laboratory of Inorganic Chemistry, University of Patras, 26504 Patras, Greece; (NL) lali@upatras.gr; (VT) vtango@upatras.gr

<sup>2</sup> Institute of Chemical Engineering Sciences (ICE-HT), Foundation for Research and Technology-Hellas (FORTH), 26504 Patras, Greece;

<sup>3</sup> Regional Centre of Advanced Technologies and Materials, Czech Advanced Technology and Research Institute (CATRIN), Palacký University Olomouc, Křížkovského 511/8, 77900, Czech Republic; (O.M.) ondrej.malina@upol.cz ; (M.P.) michaela.polaskova@upol.cz ; (M.P.) martin.petr@upol.cz;

\*Correspondence: (N.L.) lali@upatras.gr; (O.M.) ondrej.malina@upol.cz ;

**Table of Contents**

|                                                                  |   |
|------------------------------------------------------------------|---|
| <i>TEM Study</i> .....                                           | 2 |
| <i>IR Spectra</i> .....                                          | 3 |
| <i>p-XRD measurements</i> .....                                  | 4 |
| <i>TGA Studies</i> .....                                         | 5 |
| <i>XPS Studies</i> .....                                         | 6 |
| <i>Magnetic Susceptibility data at sweep rate 10 K/min</i> ..... | 7 |
| <i>DSC studies</i> .....                                         | 9 |
| <i>Raman spectroscopy</i> .....                                  | 9 |

## TEM Study

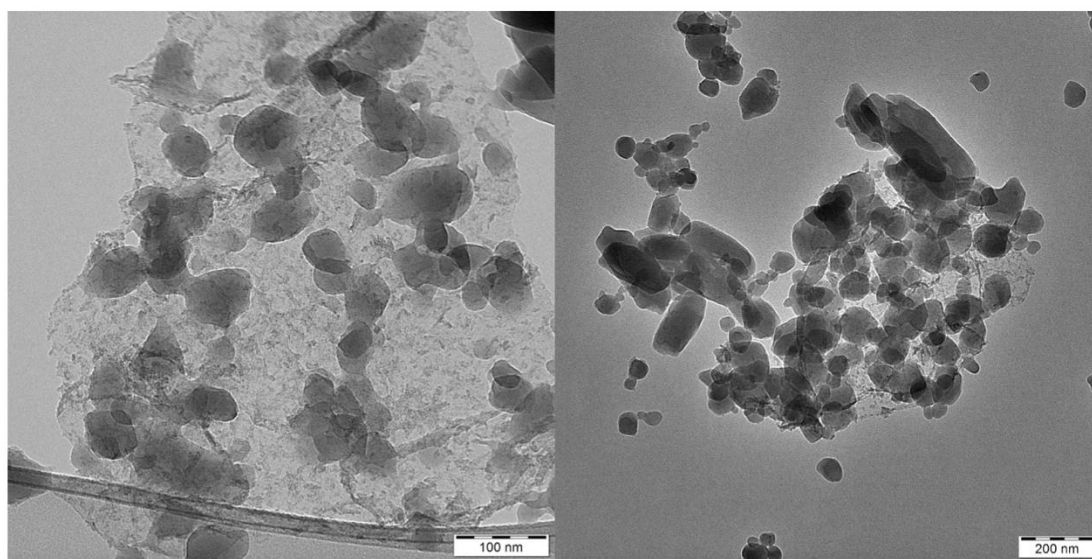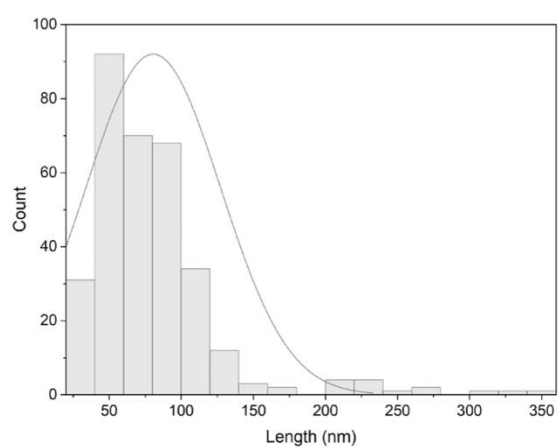

**Figure S1.** TEM images of NP4 with Gaussian distributions of sizes.

## IR Spectra

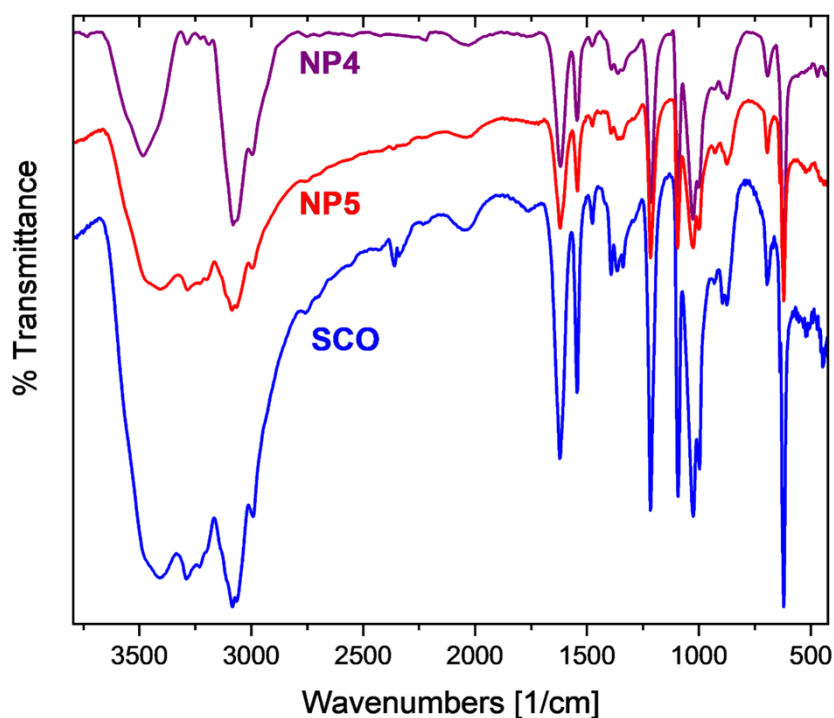

**Figure S2.** IR spectra of the NP4-5 and pristine  $[\text{Fe}(\text{NH}_2\text{trz})_3](\text{Br})_2$  NPs (SCO). Due to the low amount of GO in the hybrids it was not possible to identify characteristic band of the GO.

**Table S1.** Assignment of the observed bands in the IR spectra.

| $[\text{Fe}(\text{atrz})_3](\text{Br})_2$ | description,                                                                               | $\text{Fe}(\text{atrz})_3(\text{Br})_2$ | description,                |
|-------------------------------------------|--------------------------------------------------------------------------------------------|-----------------------------------------|-----------------------------|
| 3410s-3285 s, br                          | $\text{Vas}(\text{NH}_2)$ $\text{Vs}(\text{NH}_2)$<br>$\text{v}(\text{OH})_{\text{water}}$ | 1093s                                   | $\delta(\text{CH})$         |
| 3085s                                     | $\text{V}(\text{CH})$ stretch                                                              | 1026s                                   | $\text{R}_6$ ring stretch   |
| 1620s                                     | $\delta(\text{NH}_2)$                                                                      | 1000m                                   | $\text{R}_7$ ring breathing |
| 1545s                                     | $\text{R}_1$ ring stretch                                                                  | 891m, br                                | $\gamma(\text{CH})$ bend    |
| 1475m                                     | $\text{R}_2$ ring stretch                                                                  | 876m                                    | $\beta(\text{NH}_2)$        |
| 1390m, br                                 | $\text{R}_3$ ring stretch                                                                  | 693m                                    | $\text{R}_8$ ring torsion   |
| 1215s                                     | $\text{V}(\text{N}-\text{NH}_2)$                                                           | 621s                                    | $\text{R}_9$ ring torsion   |

m = medium, w = weak, br = broad, and s = strong

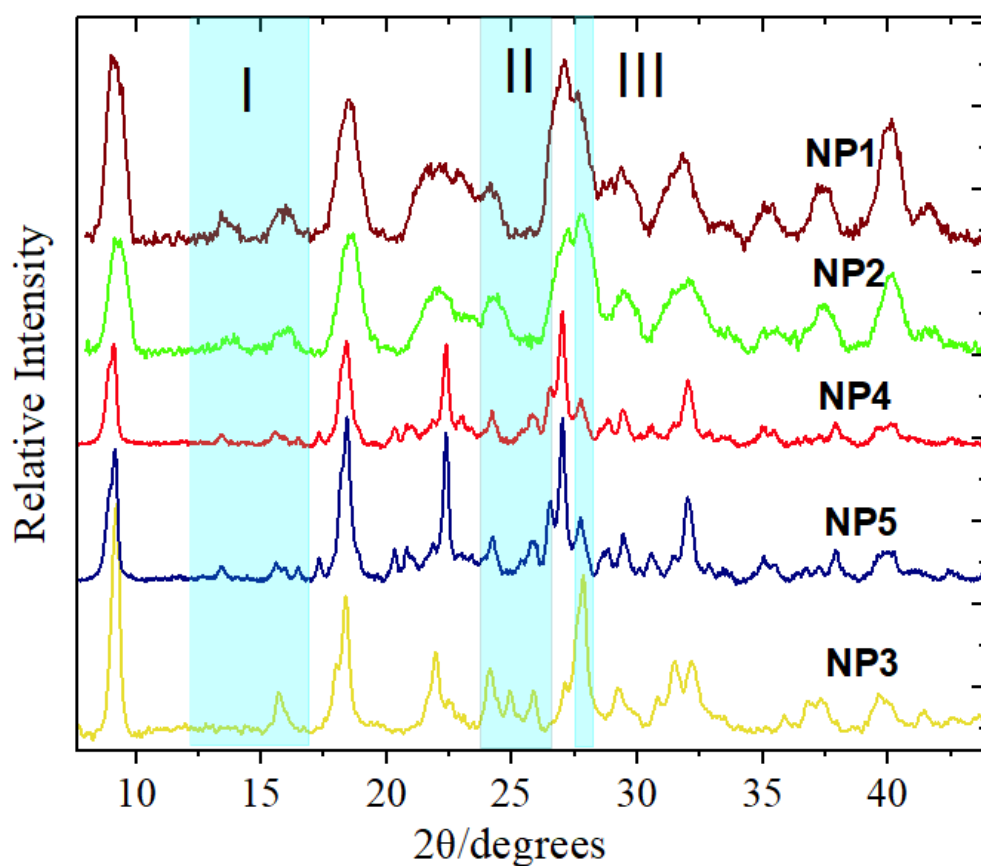

**Figure S3.** pXRD spectra of the **NP4** and **NP5**. For comparison reasons the pXRD of the pristine  $[\text{Fe}(\text{NH}_2\text{trz})_3](\text{Br})_2$  NPs discussed in ref [27] are also presented. The three distinctive areas are outlined in blue color and named I, II, III. The crystallinity of the products **NP4-5** is improved in comparison to the **NP1-3**. pXRD spectra of the **NP4** and **NP5** present similar characteristics with the pristine ones with synthetic parameters  $\omega_0 = 4$  (or) 10 and a reaction time equal to 24 hours (**NP1-2**) while clear differences appear in comparison to the the pristine ones with synthetic parameters  $\omega_0 = 10$  and a reaction time equal to 2 days (**NP3**)

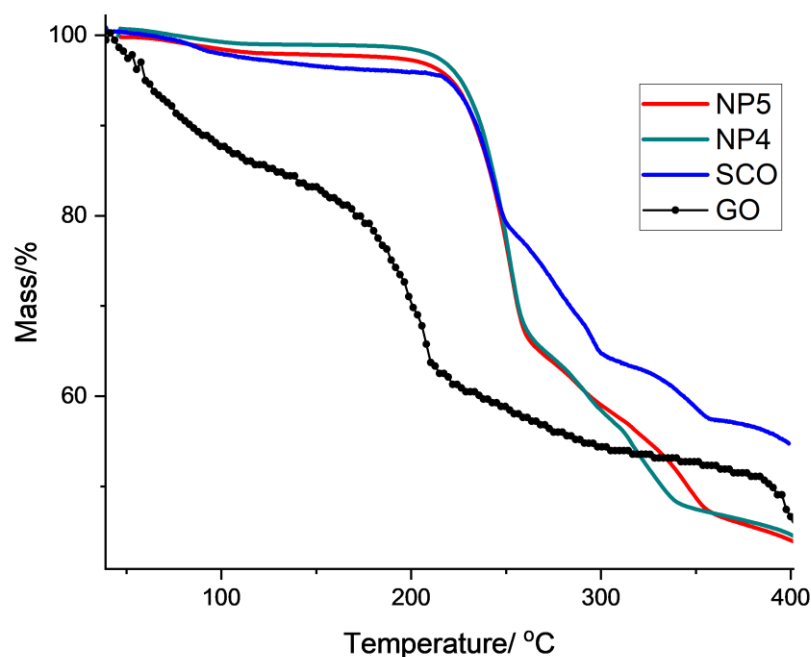

**Figure S4.** Thermogravimetric curves of the **NP4**, **NP5**, pristine  $[\text{Fe}(\text{NH}_2\text{trz})_3](\text{Br})_2$  NPs (**SCO**) and **GO**. Both the hybrids and the pristine NPs are stable up to 220° C and a more abrupt decrease is monitored for the case of **NP4**, **NP5** due to their hybrid nature. Analogous behavior has been observed in the nanocomposites of  $[\text{Fe}(\text{Htrz})(\text{trz})_2](\text{BF}_4)$  NPs with GO in ref [28]. According to the thermogravimetric analysis, the initial degradation of GO until 200 °C may be ascribed to the evaporation of CO, CO<sub>2</sub> and water moisture from the sheets. A slight change in the thermal decomposition in GO hybrid samples and the pristine SCO is observed, indicating that the amount of GO flakes is small to abrupt change the decomposition behaviour of the hybrids.

(a)

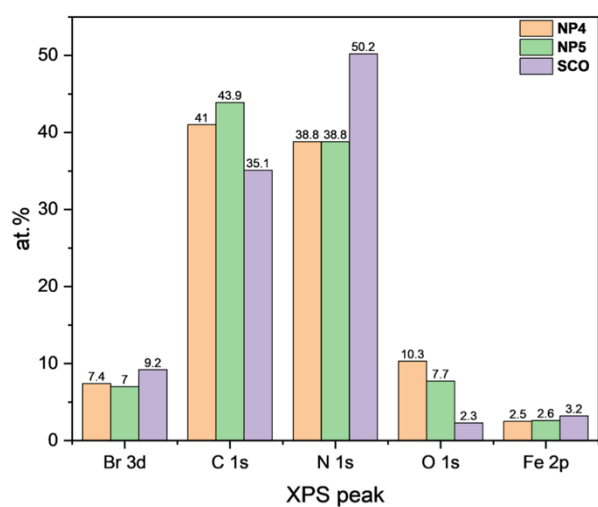

(b)

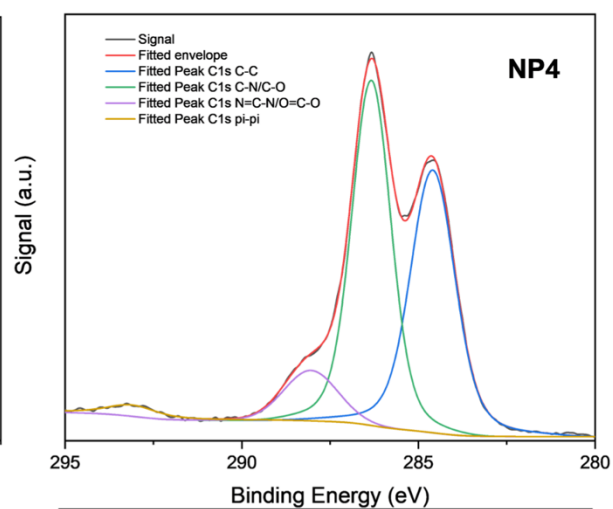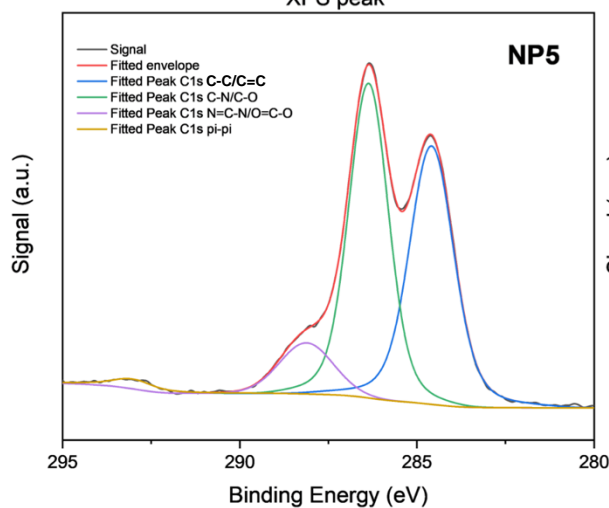

(c)

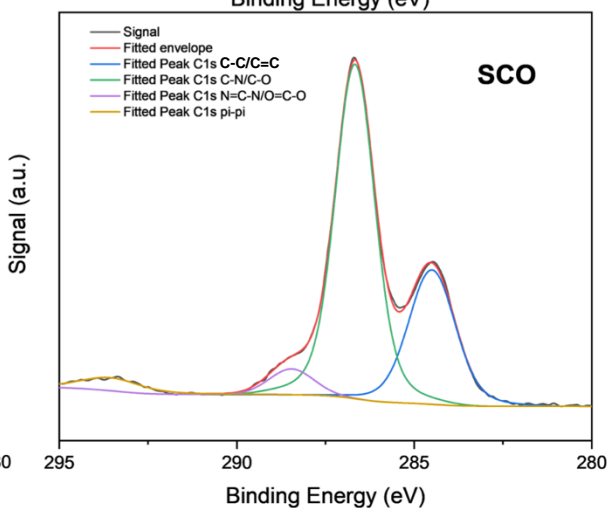

(d)

**Figure S5.** a) C 1s bonds quantification b) C 1s spectrum of **NP4** c) C 1s spectrum of **NP5** d) C 1s spectrum of pristine  $[\text{Fe}(\text{NH}_2\text{trz})_3](\text{Br})_2$  NPs (**SCO**).

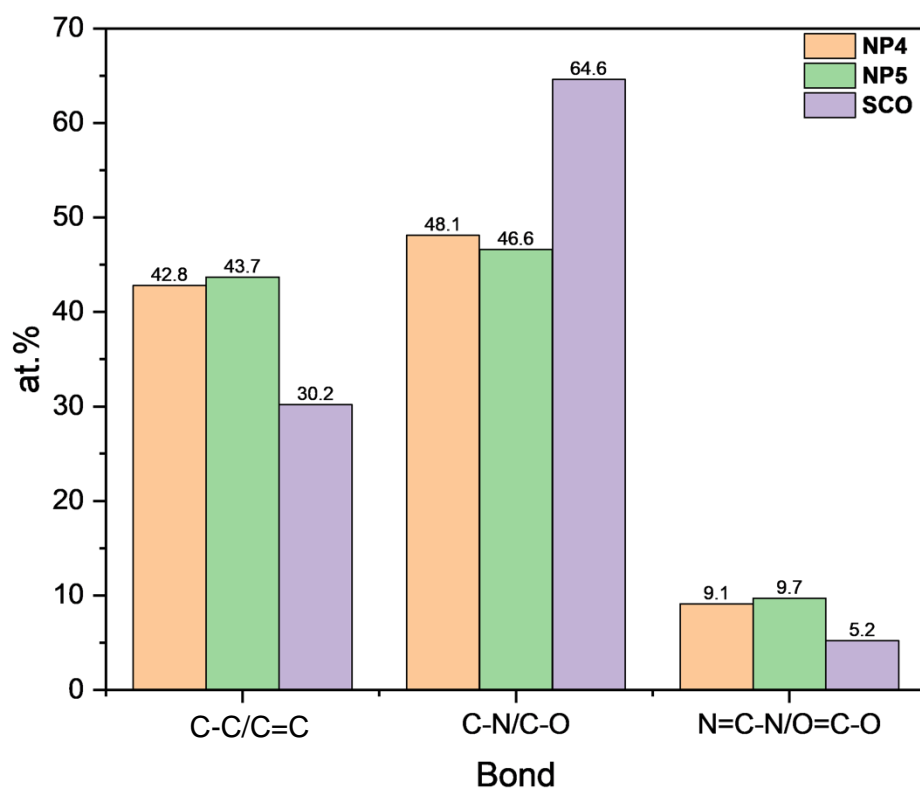

**Figure S6.** Elemental quantification according to the XPS analysis of the **NP4**, **NP5** and pristine  $[\text{Fe}(\text{NH}_2\text{trz})_3](\text{Br})_2$  NPs (**SCO**).

Magnetic Susceptibility data at sweep rate 10 K/min

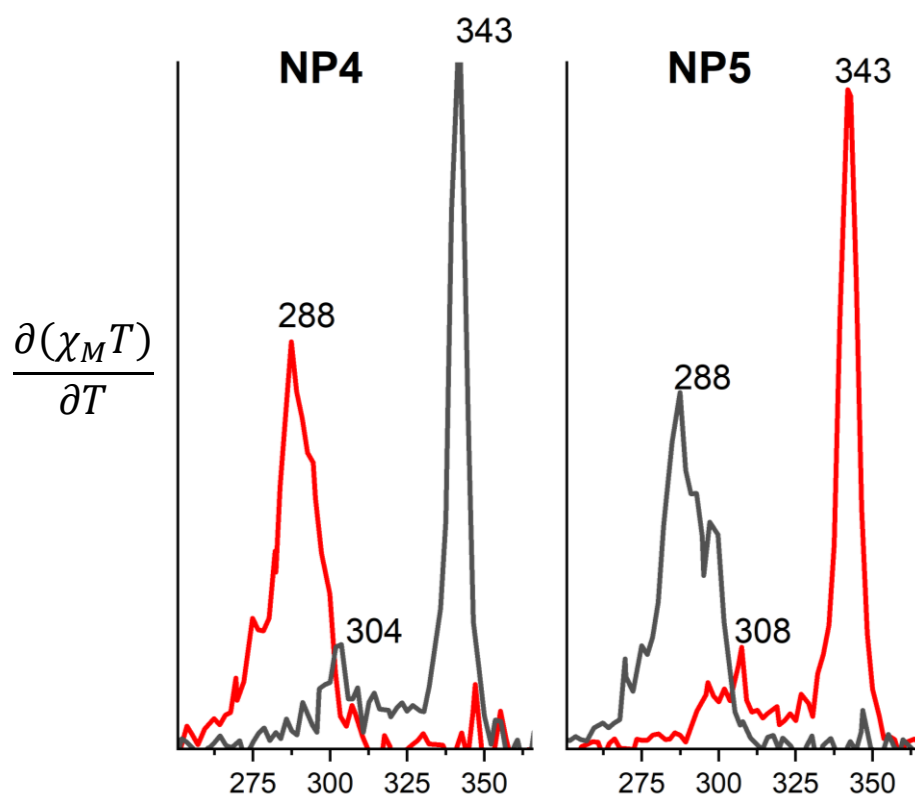

**Figure S7.** The first derivatives of the thermal hysteresis of **NP4** and **NP5** for magnetic sweep rate of 10 K/min. For the case of **NP5** the red line is associated with the heating mode and the black line with the cooling mode. For the case of **NP4** the red line is associated with the cooling mode while the black line with the heating mode.



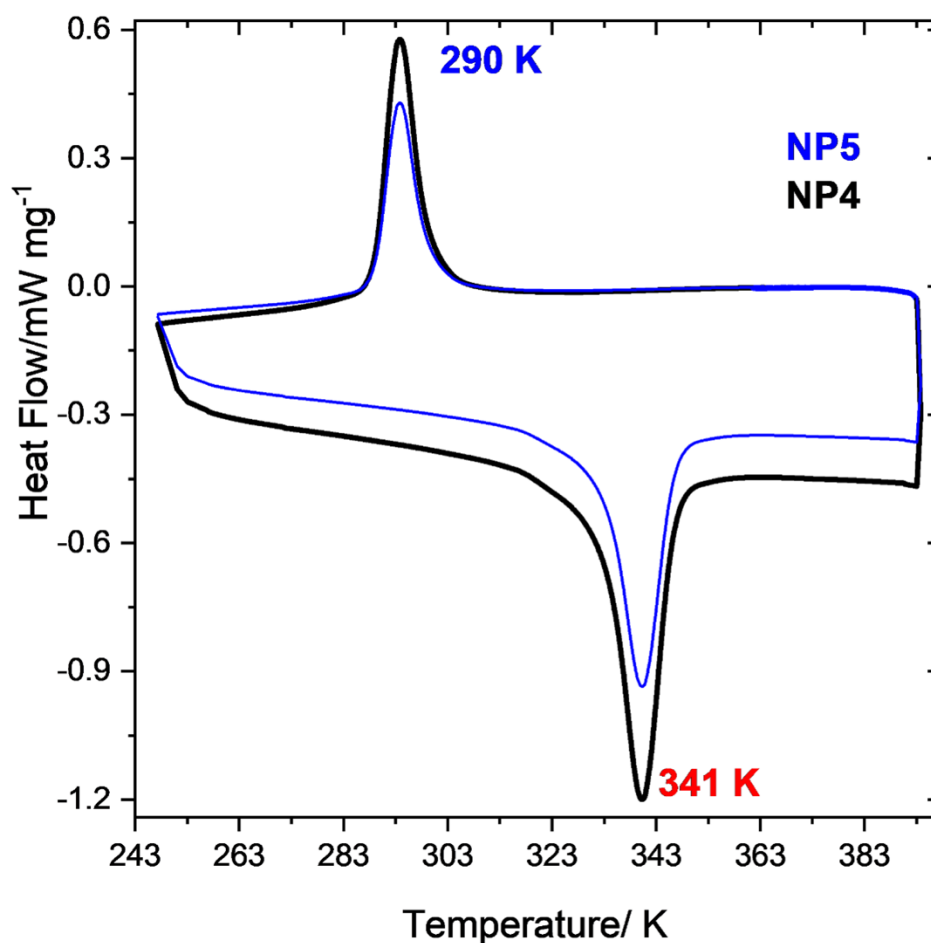

**Figure S8.** DSC curves of NP4-5 presenting the 3<sup>rd</sup> heating-cooling cycle at 10 K/min.

#### Raman spectroscopy

**Table S2.** Peak assignments of  $[\text{Fe}(\text{NH}_2\text{trz})_3]\text{Br}_2$  nanoparticles (NPs 1-5) in the diamagnetic low spin state ( $s=0$ ). Meaning of symbols: L, librations; T, translations;  $\nu$ : stretching;  $\delta$ : deformation or in-plane bending;  $\omega$ , wagging;  $\tau$ : torsion;  $rg$ : ring)

| Appx. wavenumber region ( $\text{cm}^{-1}$ ) | Peak assignment          | Vibrational mode |
|----------------------------------------------|--------------------------|------------------|
| 195                                          | $\text{NH}_2\text{-trz}$ | L                |
| 248                                          | $\text{NH}_2\text{-tz}$  | T                |
| 445                                          | $\text{C-N-NH}_2$        | $\delta$         |
| 635                                          | $\text{NH}_2$            | $\omega$         |

|      |                                 |                               |
|------|---------------------------------|-------------------------------|
| 702  | N-NH <sub>2</sub>               | $\nu$ , $\tau$ rg             |
| 1006 | N-N                             | $\nu$                         |
| 1037 | N-N                             | $\delta$ rg                   |
| 1104 | C-NNH <sub>2</sub> , H-C-N      | $\delta$ rg, $\nu$ , $\delta$ |
| 1218 | H-C-N                           | $\delta$                      |
| 1368 | C-NNH <sub>2</sub>              | $\nu$                         |
| 1398 | C-N, N-NH <sub>2</sub>          | $\nu$ , $\nu$                 |
| 1478 | C-N                             | $\nu$                         |
| 1545 | C-N, C-NNH <sub>2</sub> , H-C-N | $\nu$ , $\nu$ , $\delta$      |
| 1616 | NH <sub>2</sub>                 | $\delta$                      |
